# Supplementary material
Source: Springer Nature journal article supplement (https://www.springermedizin.de/resource/supplementary/12943_2010_766_MOESM1_ESM.pdf/9554772)

**Oncogenesis**

**Proliferation and survival of tumor cells**

**Proliferation and differentiation of immune cells**

**Physiologic responses**

Proteolytic cleavage X

Sema4D

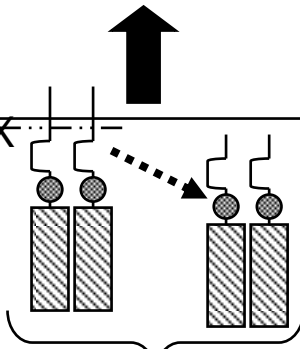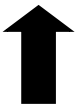

CD72

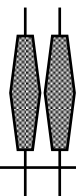

Plexin-B1

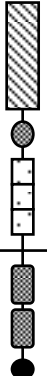

**Physiologic responses**

**Regulation of immune response**

**Axonal guidance in nervous system;  
Angiogenesis**

**Oncogenesis**

**Invasive growth; Tumor angiogenesis;  
Regulation of tumor-associated macrophages**

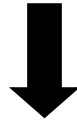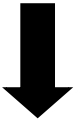

Supplement: MOESM1 [file 9554772]
